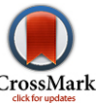

## Correction

# Correction: Structure and Growth of the Leeward Kohala Field System: An Analysis with Directed Graphs

## The PLOS ONE Staff

File S1 is an accidental duplicate of File S2. The correct File S1 can be viewed below.

## Supporting Information

**File S1. Level assignments in the Lapakahi detailed study area for plotting with Google Earth.**

(ZIP)

## Reference

1. Dye TS (2014) Structure and Growth of the Leeward Kohala Field System: An Analysis with Directed Graphs. PLoS ONE 9(7): e102431. doi:10.1371/journal.pone.0102431

---

**Citation:** The PLOS ONE Staff (2014) Correction: Structure and Growth of the Leeward Kohala Field System: An Analysis with Directed Graphs. PLoS ONE 9(9): e109157. doi:10.1371/journal.pone.0109157

**Published:** September 22, 2014

**Copyright:** © 2014 The PLOS ONE Staff. This is an open-access article distributed under the terms of the Creative Commons Attribution License, which permits unrestricted use, distribution, and reproduction in any medium, provided the original author and source are credited.
